# Supplementary material for: Seeds of Success: Empowering Latina STEM Girl Ambassadors Through Role Models, Leadership, and STEM-Related Experiences
Source: PubMed Central journal article supplement (PMC10601408), 2023-09-26
Supplement: NIHMS1938520-supplement-1.pdf [file NIHMS1938520-supplement-1.pdf]

### **ASSOCIATED CONTENT**

Supplemental material mentioned in this manuscript can be found uploaded to the same webpage as this the manuscript.
