# Supplementary material for: Seeds of Success: Empowering Latina STEM Girl Ambassadors Through Role Models, Leadership, and STEM-Related Experiences
Source: PubMed Central journal article supplement (PMC10601408), 2023-09-26
Supplement: NIHMS1938520-supplement-Appendix__Additional_Tables.pdf [file NIHMS1938520-supplement-Appendix__Additional_Tables.pdf]

## Empowering Latina Girls in STEM - Hernández-Matías et al.

### Appendix. Additional Tables

**Table 1.** Sample of Seeds of Success STEM Ambassadors Projects carried out during the 2020-2021 and 2021-2022 cohorts. Descriptions come from the girls' final project reports.

| Title                                                     | Summary                                                                                                                                                                                                                                                    |
|-----------------------------------------------------------|------------------------------------------------------------------------------------------------------------------------------------------------------------------------------------------------------------------------------------------------------------|
| Microplastics in the Water                                | Organized a talk about microplastics, where they are found, and how they affect humans.                                                                                                                                                                    |
| Away Mosquitoes!                                          | Distributed information sheets to the community on how to prevent mosquito-borne diseases and created an Instagram page with informative videos.                                                                                                           |
| Providing Help through Science                            | Planned a beach cleaning day at Humacao beach with a group of girls. Gave a talk about beach restoration and the importance of keeping beaches clean.                                                                                                      |
| How to Return to School in Person in Times of Coronavirus | Gave a presentation to kindergarten students on coronavirus prevention. Carried out an experiment to demonstrate the importance of hand-washing in preventing contagion. In addition, an interview was conducted with a doctor specialized in the subject. |
| Know More about STEM Professions                          | Create a web page about science and engineering.                                                                                                                                                                                                           |
| We Need More Allies                                       | Create a presentation about the importance of women in science.                                                                                                                                                                                            |
| Artist Cells                                              | Create a YouTube channel about the importance of the arts in STEM careers and how both things are interconnected.                                                                                                                                          |
| STEM                                                      | Organized a TikTok social network about science and experiment tutorials to increase interest in studying STEM.                                                                                                                                            |
| Awareness                                                 | Create a coloring book for elementary school with simple explanations about science professions related to nature and emphasis on how both men and women can excel in STEM fields.                                                                         |
| Fun Professions in STEM                                   | Presented an online-talk about fun professions in STEM. Carried out an experiment on the properties of different materials.                                                                                                                                |
| People with Physical Disabilities                         | Create a social network to provide information and inspiration about people who had difficulties throughout their career due to lack of support or a disability but were able to achieve their goals.                                                      |
| The Branches of Sciences                                  | Design of a word search and crossword puzzle games about STEM.                                                                                                                                                                                             |
| Solar Charger                                             | Create a 5-volt solar cell phone charger.                                                                                                                                                                                                                  |
| STEM for All                                              | Offer a talk about women in STEM, gender inequality, and the diversity of careers in STEM.                                                                                                                                                                 |
| Marine Contamination                                      | Presentation about awareness about marine pollution and endangered species.                                                                                                                                                                                |
| Water for Life                                            | Create a homemade filter to use rainwater.                                                                                                                                                                                                                 |
| Learn About STEM                                          | Create a social network about the importance of STEM and its professionals, and access to STEM education.                                                                                                                                                  |
| Geological Hazards in Puerto Rico                         | Held a panel with two women geologists to explain earthquakes. Carried out a hands-on activity about a seismograph.                                                                                                                                        |
| Sky is Not the Limit!                                     | Developed a conference to raise awareness about opportunities in science and unmask the stereotype that science is an exclusive field for men or for people with exceptional IQ.                                                                           |
| STEM Breakout Video Game                                  | Create an escape room with science challenges so participants had fun while learning about STEM.                                                                                                                                                           |

**Table 2.** Wilcoxon signed ranks test P-values for each Pre/Post-Intervention Survey item. Asterisk indicates significance.

| Category                        | Item                                                                                                                                                                                  | 2020     | 2021    |
|---------------------------------|---------------------------------------------------------------------------------------------------------------------------------------------------------------------------------------|----------|---------|
| Numerical Skills and Perception | Uno tiene que ser súper inteligente para ser un científico [You have to be super smart to be a scientist]                                                                             | 0.1635   | 0.0791  |
| Numerical Skills and Perception | No me gusta aprender matemáticas [I don't like learning math]                                                                                                                         | 0.2362   | 0.7582  |
| Numerical Skills and Perception | Los ingenieros trabajan principalmente en cosas que no tienen nada que ver conmigo [Engineers mostly work on things that have nothing to do with me]                                  | <0.0001* | <0.001* |
| Numerical Skills and Perception | La mayor parte de las personas deben saber algo de ciencia [Most people should know some science]                                                                                     | 0.0486*  | 0.8686  |
| Numerical Skills and Perception | Cuánta confianza tienes en tu habilidad de diseñar un "app" que otras personas puedan usar [How confident are you in your ability to design an "app" so that other people can use it] | 0.7199   | 0.1916  |
| Numerical Skills and Perception | Cuánta confianza tienes en tu habilidad de aprender a resolver ecuaciones de matemáticas [How confident are you in your ability to learn to solve math equations]                     | 0.5141   | 0.0002* |
| STEM Attitudes                  | Es importante saber ciencia para conseguir un buen trabajo. [It is important to know science to get a good job.]                                                                      | 0.5012   | 0.3912  |
| STEM Attitudes                  | Uno tiene que sacar todas "A" en la escuela y la universidad para ser ingeniero [One has to get all "A's" in school and university to be an engineer]                                 | 0.0489*  | 0.8187  |
| STEM Attitudes                  | Muchos ingenieros tienen otros pasatiempos e intereses aparte de la ingeniería [Many engineers have hobbies and interests other than engineering.]                                    | 0.096    | 0.0118* |
| STEM Attitudes                  | Cualquier persona puede ser ingeniero si se esfuerza [Anyone can be an engineer if they put in the effort]                                                                            | 0.4171   | 0.6973  |
| STEM Attitudes                  | Muchos científicos tienen otros pasatiempos e intereses aparte de la ciencia [Many scientists have hobbies and interests other than science.]                                         | 0.0025*  | 0.0102* |
| STEM Attitudes                  | Los científicos trabajan en las cosas que ayudan al mundo [Scientists work on things that help the world]                                                                             | 0.1702   | 0.0887  |
| Leadership Identity             | Cuánta confianza tienes en tu habilidad de construir algo mecánico que funcione [How confident are you in your ability to build something mechanical that works]                      | 0.1379   | 0.694   |
| Leadership Identity             | Soy una líder [I am a leader]                                                                                                                                                         | >0.9999  | 0.6488  |
| Leadership Identity             | Si veo un problema en mi comunidad puedo hacer algo para resolverlo [If I see a problem in my community I can do something to solve it]                                               | 0.0983   | 0.0539  |
| Leadership Identity             | Puedo convencer a otras personas a que me ayuden en mis proyectos [I can convince other people to help me in my projects]                                                             | 0.4579   | 0.2069  |
| Leadership Identity             | Trabajo bien con otros en equipo [I work well with others in a team]                                                                                                                  | 0.2128   | 0.9013  |
| Leadership Identity             | En el futuro planeo competir en una feria de ciencia o de matemáticas [In the future I plan to compete in a science or math fair]                                                     | 0.4842   | 0.8593  |
| Program Objectives              | Tengo confianza en mi capacidad de ser una líder [I am confident in my ability to be a leader]                                                                                        | .        | 0.0311* |
| Program Objectives              | Conozco sobre diferentes carreras en STEM [I know about different careers in STEM]                                                                                                    | .        | 0.001*  |
| Program Objectives              | Tengo confianza en mi capacidad de tener éxito en las ciencias [I am confident in my ability to succeed in science]                                                                   | .        | 0.0044* |
| Program Objectives              | Conozco de oportunidades que existen para mi en STEM [I know of opportunities that exist for me in STEM]                                                                              | .        | 0.0001* |
| Program Objectives              | Tengo un gran interés por estudiar disciplinas STEM [I have a great interest in studying STEM disciplines]                                                                            | .        | 0.7033  |
| Program Objectives              | Siento que tengo acceso a modelos a seguir y mentoras en STEM [I feel I have access to role models and mentors in STEM]                                                               | .        | 0.0001* |
| Science Identity                | No puedo explicar bien lo que hace un científico [I can't quite explain what a scientist does]                                                                                        | <0.0001* | 0.0001* |
| Science Identity                | Cuánta confianza tienes en tu habilidad de desarrollar y realizar un experimento científico [How confident are you in your ability to develop and conduct a science experiment]       | 0.1454   | 0.0771  |
| Science Identity                | Cuánta confianza tienes en tu habilidad de ayudar a tus amigos a entender la clase de ciencias [How confident are you in your ability to help your friends understand science class?] | 0.6659   | 0.8626  |
| Science Identity                | Soy buena en ciencia [I am good at science]                                                                                                                                           | 0.7205   | 0.2079  |
| Science Identity                | Sé mucho de ciencia [I know a lot about science]                                                                                                                                      | 0.7205   | 0.3964  |
| Science Identity                | La ciencia es fácil para mí [Science is easy for me]                                                                                                                                  | 0.5412   | 0.3897  |
| Science Identity                | Me gusta hablar de ciencias con otras personas [I like to talk about science with other people]                                                                                       | 0.1065   | 0.0513  |
| Science Identity                | Domino los temas de ciencia [I understand science topics]                                                                                                                             | 0.1458   | 0.0579  |

**Table 2** (continued).

| Category         | Item                                                                                                                                                                                          | 2020           | 2021   |
|------------------|-----------------------------------------------------------------------------------------------------------------------------------------------------------------------------------------------|----------------|--------|
| Science Identity | Aprendo fácilmente nuevos temas de ciencia [I learn new science topics easily]                                                                                                                | 0.3683         | 0.9275 |
| Science Identity | Puedo ayudar a las personas cuando tienen dudas de ciencia [I can help people when they have science questions]                                                                               | 0.6245         | 0.2093 |
| STEM interest    | En el futuro planeo participar en un campamento de ciencia, informática, robótica, o matemáticas [In the future I plan to participate in a science, computer science, robotics, or math camp] | 0.1978         | 0.7155 |
| STEM interest    | Mis amigos me ven como una persona que es buena en ciencia [My friends see me as a person who is good at science.]                                                                            | 0.8969         | 0.1366 |
| STEM interest    | Me gustaría tener una carrera relacionada a las ciencias o la ingeniería [I would like to have a career related to science or engineering]                                                    | 0.1379         | 0.9817 |
| STEM interest    | Me gusta aprender ciencias [I like learning science]                                                                                                                                          | <b>0.0396*</b> | 0.1218 |
| STEM interest    | Quiero estudiar ciencias o ingeniería en la universidad [I want to study science or engineering at university]                                                                                | 0.9795         | 0.7689 |
| STEM interest    | No tengo planes de tener una carrera en ciencias o ingeniería [I have no plans to have a career in science or engineering]                                                                    | 0.9082         | 0.3299 |
| STEM interest    | En el futuro planeo matricularme en clases avanzadas o electivas de ciencia o matemáticas [In the future I plan to enroll in advanced or elective science or math classes]                    | 0.3507         | 0.4508 |
